# Supplementary material for: MSK1 is required for the beneficial synaptic and cognitive effects of enriched experience across the lifespan
Source: Aging (Albany NY). 2023 Jul 10;15(13):6031–72. doi: 10.18632/aging.204833 (PMC10373962; doi:10.18632/aging.204833)
Supplement: Supplementary Data 1-8 [file aging-15-204833-s003.xls]

## Sheet: 1. Summary of DEGs
	WTSH	WTEE	KDSH	KDEE
WTSH	-	-	-	-
WTEE	2	-	-	-
KDSH	0	17	-	-
KDEE	0	118	12	-

## Sheet: 2. WTSH vs. WTEE
Gene Symbol	baseMean	log2FoldChange	lfcSE	stat	pvalue	padj	ensembl	RefSeq	entrez	type
Ighm	1175.93	0.677941	0.123941	5.46989	4.50322e-08	0.00131107	ENSMUSG00000076617	NA	16019	other
Batf3	54.0572	0.90421	0.192095	4.70709	2.51273e-06	0.0365778	ENSMUSG00000026630	NM_030060	381319	protein-coding

## Sheet: 3. WTSH vs. KDSH
Gene Symbol	baseMean	log2FoldChange	lfcSE	stat	pvalue	padj	ensembl	RefSeq	entrez	type
No DEGs Observed

## Sheet: 4. WTSH vs. KDEE
Gene Symbol	baseMean	log2FoldChange	lfcSE	stat	pvalue	padj	ensembl	RefSeq	entrez	type
No DEGs Observed

## Sheet: 5. KDSH vs. KDEE
Gene Symbol	baseMean	log2FoldChange	lfcSE	stat	pvalue	padj	ensembl	RefSeq	entrez	type
Cdh3	50.134	6.37407	1.504	4.23807	2.25451e-05	0.0448542	ENSMUSG00000061048	NM_001037809	12560	protein-coding
Plekho2	884.801	0.467542	0.102834	4.54657	5.45277e-06	0.0448542	ENSMUSG00000050721	NM_153119	102595	protein-coding
Tnfaip2	328.357	0.581964	0.13652	4.26285	2.0184e-05	0.0448542	ENSMUSG00000021281	NM_009396	21928	protein-coding
Wnt3	106.88	0.600941	0.142123	4.22833	2.35436e-05	0.0448542	ENSMUSG00000000125	NM_009521	22415	protein-coding
Ighm	1175.93	0.482176	0.116866	4.12588	3.69315e-05	0.0481756	ENSMUSG00000076617	NA	16019	other
Sycp2	94.7937	-0.737335	0.145382	-5.07172	3.94244e-07	0.00858545	ENSMUSG00000060445	NM_177191	320558	protein-coding
Banp	1236.88	-0.544379	0.12908	-4.21737	2.47164e-05	0.0448542	ENSMUSG00000025316	NM_001110100	53325	protein-coding
Myo1h	96.8471	-0.650596	0.144266	-4.5097	6.4919e-06	0.0448542	ENSMUSG00000066952	NM_001164573	231646	protein-coding
Traip	1196.03	-0.481741	0.114051	-4.22391	2.40103e-05	0.0448542	ENSMUSG00000032586	NM_011634	22036	protein-coding
C4a	129.031	-0.675832	0.163969	-4.12171	3.76078e-05	0.0481756	ENSMUSG00000015451	NM_011413	625018	protein-coding
Gh	367.797	-6.88544	1.6581	-4.1526	3.28721e-05	0.0481756	ENSMUSG00000020713	NM_008117	14599	protein-coding
Gm26621	34.2923	-0.845471	0.204183	-4.14075	3.46166e-05	0.0481756	NA	NA	NA	NA

## Sheet: 6. KDSH vs. WTEE
Gene Symbol	baseMean	log2FoldChange	lfcSE	stat	pvalue	padj	ensembl	RefSeq	entrez	type
Ighm	1175.93	0.704639	0.116422	6.05244	1.42669e-09	2.62383e-05	ENSMUSG00000076617	NA	16019	other
Klhl40	258.689	0.591541	0.110524	5.35216	8.69102e-08	0.000799183	ENSMUSG00000074001	NM_028202	72330	protein-coding
Batf3	54.0572	0.912685	0.181757	5.02146	5.12813e-07	0.00235779	ENSMUSG00000026630	NM_030060	381319	protein-coding
Bok	3763.39	0.526702	0.109889	4.79301	1.64294e-06	0.0050359	ENSMUSG00000026278	NM_016778	51800	protein-coding
Cd14	159.502	0.641366	0.13841	4.63381	3.58994e-06	0.00660226	ENSMUSG00000051439	NM_009841	12475	protein-coding
Lrg1	82.8611	1.4495	0.311728	4.64989	3.32117e-06	0.00660226	ENSMUSG00000037095	NM_029796	76905	protein-coding
Mylk3	91.4731	0.982834	0.211964	4.63681	3.53833e-06	0.00660226	ENSMUSG00000031698	NM_001297612	213435	protein-coding
Bambi	311.569	0.438235	0.0954275	4.59233	4.38316e-06	0.00732825	ENSMUSG00000024232	NM_026505	68010	protein-coding
Flywch2	308.742	0.579802	0.140884	4.11546	3.86401e-05	0.0418017	ENSMUSG00000023911	NM_001357140	76917	protein-coding
Cdk15	27.2971	1.09859	0.26899	4.08413	4.42416e-05	0.0446368	ENSMUSG00000026023	NM_001033373	271697	protein-coding
Hbb-bs	2405.23	1.78963	0.439229	4.07449	4.61149e-05	0.0446368	ENSMUSG00000052305	NM_001201391	100503605	protein-coding
A930003A15Rik	13.4752	1.50928	0.374757	4.02735	5.64093e-05	0.049225	ENSMUSG00000075330	NR_015488	68162	ncRNA
Bcl3	82.3765	0.950097	0.236505	4.01724	5.88848e-05	0.049225	ENSMUSG00000053175	NM_033601	12051	protein-coding
Frem3	97.4528	-0.825409	0.161046	-5.12531	2.97055e-07	0.00182105	ENSMUSG00000042353	NM_001167898	333315	protein-coding
Hrk	2359.92	-0.546245	0.112569	-4.85253	1.21897e-06	0.0044836	ENSMUSG00000046607	NM_007545	12123	protein-coding
Dio3	346.733	-0.737296	0.167469	-4.40257	1.06977e-05	0.0153827	ENSMUSG00000075707	NM_172119	107585	protein-coding
Myo1h	96.8471	-0.600491	0.140156	-4.28445	1.8319e-05	0.0224603	ENSMUSG00000066952	NM_001164573	231646	protein-coding

## Sheet: 7. WTEE vs. KDEE
Gene Symbol	baseMean	log2FoldChange	lfcSE	stat	pvalue	padj	ensembl	RefSeq	entrez	type
Gm38198	26.3474	2.54113	0.496077	5.12244	3.01604e-07	0.00422004	NA	NA	NA	NA
Gm42822	16.1385	2.96966	0.574562	5.16856	2.35908e-07	0.00422004	NA	NA	NA	NA
Gm43047	17.7415	3.03359	0.608017	4.98931	6.05946e-07	0.0042392	NA	NA	NA	NA
Gm44230	20.9856	2.71853	0.54146	5.02074	5.14736e-07	0.0042392	NA	NA	NA	NA
Gm43317	20.8046	4.53352	0.938333	4.83146	1.35536e-06	0.0075857	NA	NA	NA	NA
Gm42770	27.1408	2.49225	0.521777	4.77647	1.78401e-06	0.00777111	NA	NA	NA	NA
Gm44797	13.514	3.60958	0.758448	4.75917	1.94389e-06	0.00777111	NA	NA	NA	NA
Gm19445	21.0779	2.60164	0.551229	4.71971	2.36185e-06	0.00826174	NA	NA	100502904	unknown
Gm10717	7.0156	5.77126	1.23945	4.6563	3.21943e-06	0.00857156	NA	NA	NA	NA
Gm10800	1019.84	5.24057	1.12811	4.64543	3.39375e-06	0.00857156	NA	NA	NA	NA
Gm15812	3.32932	4.71225	1.02509	4.5969	4.28823e-06	0.00857156	NA	NA	NA	NA
Gm42768	18.4074	2.57713	0.551436	4.67348	2.96135e-06	0.00857156	NA	NA	NA	NA
Gm42772	31.7593	2.3115	0.50177	4.60668	4.0914e-06	0.00857156	NA	NA	NA	NA
Gm44800	12.3207	3.44905	0.747012	4.61713	3.89091e-06	0.00857156	NA	NA	NA	NA
Gm26023	1.94397	4.67321	1.04055	4.49111	7.08534e-06	0.0115511	NA	NA	NA	NA
Gm37529	12.3453	2.07339	0.462511	4.48291	7.36307e-06	0.0115511	NA	NA	NA	NA
Gm43048	7.68852	3.64864	0.812711	4.48946	7.14031e-06	0.0115511	NA	NA	NA	NA
Gm45159	59.665	2.81323	0.629438	4.46943	7.8427e-06	0.0115511	NA	NA	NA	NA
Gm45182	12.4396	2.82642	0.630785	4.4808	7.43648e-06	0.0115511	NA	NA	NA	NA
Batf3	54.0572	0.734348	0.169577	4.33048	1.48786e-05	0.0173534	ENSMUSG00000026630	NM_030060	381319	protein-coding
Gm37051	7.45793	4.33828	1.00122	4.33301	1.47087e-05	0.0173534	NA	NA	NA	NA
Gm43606	8.1046	3.58971	0.828135	4.33469	1.45965e-05	0.0173534	NA	NA	NA	NA
Gm43879	14.8679	3.30389	0.762949	4.33042	1.48828e-05	0.0173534	NA	NA	NA	NA
Muc6	60.1243	1.57208	0.360715	4.35823	1.31116e-05	0.0173534	ENSMUSG00000118661	NM_001330001	353328	protein-coding
Gm10801	82.2555	4.94034	1.14639	4.30947	1.63643e-05	0.0178457	NA	NA	NA	NA
Gm37180	7.39015	3.13394	0.72771	4.30657	1.65805e-05	0.0178457	NA	NA	NA	NA
Gm10048	20.3906	2.95696	0.68931	4.28974	1.78883e-05	0.0185402	NA	NM_001039226	625026	unknown
Gm26601	11.3134	2.4888	0.58951	4.2218	2.42357e-05	0.0202766	NA	NA	NA	NA
Gm26835	22.303	1.82795	0.43219	4.2295	2.34216e-05	0.0202766	NA	NA	NA	NA
Gm37077	17.4068	2.71936	0.640232	4.24747	2.16199e-05	0.0202766	NA	NA	NA	NA
Gm37899	33.3645	1.9322	0.454461	4.25162	2.12232e-05	0.0202766	NA	NA	NA	NA
Gm42771	16.77	3.16626	0.748135	4.2322	2.31419e-05	0.0202766	NA	NA	NA	NA
Gm42993	13.8376	3.13533	0.743302	4.21811	2.46356e-05	0.0202766	NA	NA	NA	NA
Gm43889	9.72039	3.05745	0.722704	4.23057	2.33098e-05	0.0202766	NA	NA	NA	NA
Gm42583	42.757	2.88354	0.685181	4.20844	2.57136e-05	0.0205591	NA	NA	NA	NA
C230031I18Rik	6.93771	3.46275	0.826033	4.19202	2.76478e-05	0.0210701	NA	NA	320991	protein-coding
Gm15810	7.51077	2.86806	0.684451	4.1903	2.78585e-05	0.0210701	NA	NA	NA	NA
Gm38073	5.53761	4.0011	0.959403	4.1704	3.0406e-05	0.0223916	NA	NA	NA	NA
2900064K03Rik	31.3962	3.54247	0.854014	4.14802	3.35359e-05	0.0226397	NA	NA	72976	protein-coding
Gm43318	9.30449	3.4262	0.826584	4.14502	3.39789e-05	0.0226397	NA	NA	NA	NA
Gm43750	7.4812	2.47784	0.597767	4.14517	3.39568e-05	0.0226397	NA	NA	NA	NA
Gm43873	3.84458	3.62178	0.870554	4.16031	3.17816e-05	0.0226397	NA	NA	NA	NA
Gm21738	104.77	5.13594	1.24512	4.12486	3.7096e-05	0.0239567	NA	NA	NA	NA
Gm44678	26.7372	2.18503	0.530429	4.11936	3.79929e-05	0.0239567	NA	NA	NA	NA
RP23-11B13.4	9.25376	2.47917	0.602301	4.11616	3.85238e-05	0.0239567	NA	NA	NA	NA
Gm20642	6.58578	4.87363	1.1866	4.10723	4.00437e-05	0.0243605	NA	XR_004938619	102634076	ncRNA
Gm37602	13.2333	3.18418	0.777703	4.09435	4.23363e-05	0.0246821	NA	NA	NA	NA
Gm42766	9.27613	3.03623	0.741408	4.09522	4.2176e-05	0.0246821	NA	NA	NA	NA
Gm42448	4.78407	4.07652	0.998182	4.08395	4.42775e-05	0.0252349	NA	NA	NA	NA
Gm44241	10.5826	2.9151	0.715273	4.0755	4.59149e-05	0.0252349	NA	NA	NA	NA
Gm44435	9.45431	2.98034	0.732161	4.0706	4.68915e-05	0.0252349	NA	NA	NA	NA
Gm45263	9.66722	2.03796	0.500561	4.07134	4.67433e-05	0.0252349	NA	NA	NA	NA
Gm14636	29.5044	1.37591	0.341244	4.03204	5.52936e-05	0.026226	NA	NR_166817	100503338	ncRNA
Gm15916	6.8957	4.07134	1.00817	4.03835	5.38296e-05	0.026226	NA	NA	100416112	pseudo
Gm26937	20.9591	2.49794	0.617981	4.0421	5.29757e-05	0.026226	NA	NA	NA	NA
Gm42854	1.88722	4.44857	1.09855	4.0495	5.13278e-05	0.026226	NA	NA	NA	NA
Gm44228	19.4186	1.70698	0.42323	4.03321	5.50207e-05	0.026226	NA	NA	NA	NA
Gm44675	13.2608	3.06792	0.759554	4.0391	5.3656e-05	0.026226	NA	NA	NA	NA
Gm45191	13.7835	2.32005	0.572782	4.0505	5.11088e-05	0.026226	NA	NA	NA	NA
2900027M19Rik	27.0648	2.85807	0.711113	4.01916	5.84072e-05	0.026418	NA	NA	72880	unknown
Gm37862	8.70272	2.50577	0.622775	4.02356	5.73238e-05	0.026418	NA	NA	NA	NA
Gm43174	6.51651	3.25429	0.810416	4.01558	5.9299e-05	0.026418	NA	NA	NA	NA
Gm43872	8.3778	2.41906	0.602522	4.01489	5.94745e-05	0.026418	NA	NA	NA	NA
Gm45177	7.16641	4.36238	1.08769	4.0107	6.0539e-05	0.0264707	NA	NA	NA	NA
Gm37706	11.0128	2.56575	0.642451	3.99369	6.50528e-05	0.0280067	NA	NA	NA	NA
Gm37814	17.209	2.42906	0.608895	3.98929	6.627e-05	0.0280985	NA	NA	NA	NA
Gm19817	13.7571	1.96328	0.493493	3.97833	6.94007e-05	0.0288932	NA	NA	100503655	unknown
Gm36858	12.1152	1.48328	0.373424	3.9721	7.12419e-05	0.0288932	NA	NA	102640904	pseudo
Gm42896	3.2229	3.93215	0.989151	3.97527	7.02992e-05	0.0288932	NA	NA	NA	NA
Gm43361	10.3866	2.20475	0.556286	3.96334	7.39077e-05	0.0295462	NA	NA	NA	NA
Gm12539	7.30358	2.37238	0.600443	3.95105	7.78087e-05	0.0296795	NA	NA	667049	pseudo
Gm42609	8.15564	1.94776	0.492619	3.95388	7.68953e-05	0.0296795	NA	NA	NA	NA
Gm44798	14.6839	2.66979	0.674422	3.95864	7.53767e-05	0.0296795	NA	NA	NA	NA
Olfr55	11.9089	1.85582	0.469948	3.94898	7.84835e-05	0.0296795	ENSMUSG00000094891	NM_010998	100038859	protein-coding
5031415H12Rik	34.5195	1.28655	0.32784	3.92431	8.69788e-05	0.0324391	NA	NA	75984	protein-coding
Gm45183	5.82357	3.09379	0.788984	3.92123	8.80992e-05	0.0324391	NA	NA	NA	NA
3110080E11Rik	16.19	2.2289	0.571825	3.89786	9.70456e-05	0.0335275	NA	NA	73219	protein-coding
Gm42767	7.47348	3.68648	0.945755	3.89792	9.7024e-05	0.0335275	NA	NA	NA	NA
Gm43490	7.20158	3.14914	0.807879	3.89803	9.69764e-05	0.0335275	NA	NA	NA	NA
Gm44831	58.8452	0.764372	0.195882	3.9022	9.53205e-05	0.0335275	NA	NA	NA	NA
Kcnq1ot1	975.466	0.734976	0.18803	3.90883	9.27454e-05	0.0335275	ENSMUSG00000101609	NR_001461	63830	ncRNA
Gm26814	10.5449	1.71743	0.440965	3.89471	9.83146e-05	0.0335517	NA	NA	NA	NA
Gm26788	13.3645	1.22121	0.313834	3.89125	9.97293e-05	0.0336244	ENSMUSG00000096992	NR_165804	108167617	ncRNA
Gm44799	17.6821	1.88977	0.48617	3.88707	0.000101463	0.0338016	NA	NA	NA	NA
C130083A15Rik	4.37081	4.15459	1.07006	3.88259	0.000103349	0.0339827	NA	NA	402770	protein-coding
Gm20678	11.349	1.47748	0.381066	3.87724	0.00010565	0.0339827	NA	NA	NA	NA
Gm44802	12.2387	2.52591	0.651284	3.87836	0.000105164	0.0339827	NA	NA	NA	NA
RP23-39F24.3	12.7508	1.87252	0.483713	3.87114	0.000108329	0.0344486	NA	NA	NA	NA
C130073E24Rik	31.1911	0.841623	0.217727	3.86549	0.000110866	0.0347796	NA	NA	319805	protein-coding
Gm43915	5.617	2.37212	0.614439	3.86062	0.000113098	0.0347796	ENSMUSG00000108171	NR_138099	215458	ncRNA
Gm9874	10.1921	2.33617	0.60511	3.86073	0.000113049	0.0347796	NA	NA	791314	unknown
Gm17271	4.35715	3.73735	0.968874	3.85742	0.000114592	0.0348456	ENSMUSG00000090429	NA	115488504	pseudo
Gm45130	12.8043	2.21328	0.574156	3.85484	0.000115803	0.0348456	NA	NA	NA	NA
Gm38377	6.48329	2.20154	0.572316	3.84673	0.000119706	0.0352665	NA	NA	NA	NA
Gm43321	14.1092	2.30421	0.599011	3.84669	0.000119723	0.0352665	NA	NA	NA	NA
Gm9916	15.9296	1.85897	0.483737	3.84294	0.000121572	0.0354381	NA	NA	791377	unknown
CAAA01194877.2	11.426	2.25729	0.588431	3.83612	0.000124992	0.0359472	NA	NA	NA	NA
Gm44680	9.97473	2.30701	0.601666	3.83437	0.000125887	0.0359472	NA	NA	NA	NA
Gm26543	4.20248	2.9133	0.761231	3.82709	0.000129666	0.0362857	NA	NA	NA	NA
Gm37628	21.4709	2.53091	0.660913	3.82942	0.000128446	0.0362857	NA	NA	NA	NA
Gm19035	4.13641	3.10844	0.814796	3.81499	0.000136187	0.0377331	NA	NA	100418149	pseudo
Gm38348	8.11674	2.21241	0.58054	3.81096	0.000138428	0.0379782	NA	NA	NA	NA
Gm43019	4.03695	4.54599	1.19439	3.80612	0.000141165	0.0379841	NA	NA	NA	NA
Svet1	7.197	2.68345	0.704799	3.80739	0.000140439	0.0379841	NA	NA	266615	unknown
Gm15828	4.48894	4.41474	1.16552	3.78778	0.000151997	0.0394286	NA	NA	102640489	pseudo
Gm19409	10.878	1.58482	0.417901	3.79233	0.000149239	0.0394286	NA	NA	100502845	unknown
Gm26870	65.5971	4.7744	1.26057	3.7875	0.000152169	0.0394286	NA	NA	NA	NA
Gm42841	8.81044	2.48097	0.654507	3.7906	0.000150283	0.0394286	NA	NA	NA	NA
Gm38243	7.6775	2.36584	0.625039	3.78511	0.000153643	0.0394453	NA	NA	NA	NA
Gm44242	25.2838	1.91501	0.50645	3.78123	0.000156054	0.0397001	NA	NA	NA	NA
Gm42991	7.89606	2.83479	0.755612	3.75164	0.000175682	0.0442909	NA	NA	NA	NA
Gm38286	8.96841	2.95167	0.787738	3.74702	0.000178949	0.0447118	NA	NA	NA	NA
Gm44433	16.2842	2.35592	0.63192	3.72819	0.000192861	0.0477612	NA	NA	NA	NA
Gm43874	6.33759	2.63935	0.709056	3.72235	0.000197379	0.0484514	NA	NA	NA	NA
Gm43319	6.40305	2.87901	0.774516	3.71718	0.000201462	0.0490236	NA	NA	NA	NA
Gm38056	15.4404	2.11976	0.570724	3.71415	0.000203887	0.0491859	NA	NA	NA	NA
Gm37728	9.13644	2.65351	0.715229	3.71002	0.000207244	0.0495685	NA	NA	NA	NA
Gm42946	6.12158	4.10575	1.1077	3.70657	0.000210084	0.049822	NA	NA	NA	NA

## Sheet: 8. post-QC Sample_Table
sampleName	fileName	condition	genotype	housing		Total number of reads used for alignment	% Read Alignment (uniquely mapped)
1	Sample_1.txt	KDSC	mut	SC		54727964	92.34
3	Sample_3.txt	KDSC	mut	SC		53638956	92.37
8	Sample_8.txt	KDSC	mut	SC		57661990	93.92
18	Sample_18.txt	KDSC	mut	SC		63578958	91.96
24	Sample_24.txt	KDSC	mut	SC		51763712	92.36
9	Sample_9.txt	KDEE	mut	EE		63003239	93.31
12	Sample_12.txt	KDEE	mut	EE		51760116	92.64
14	Sample_14.txt	KDEE	mut	EE		61387419	91.87
15	Sample_15.txt	KDEE	mut	EE		61603889	90.25
20	Sample_20.txt	KDEE	mut	EE		57806259	93.03
22	Sample_22.txt	KDEE	mut	EE		34676175	91.84
2	Sample_2.txt	WTSH	WT	SC		67545451	87.88
5	Sample_5.txt	WTSH	WT	SC		61550004	92.93
19	Sample_19.txt	WTSH	WT	SC		65637103	92.52
23	Sample_23.txt	WTSH	WT	SC		60057913	93.22
10	Sample_10.txt	WTEE	WT	EE		68781365	88.81
11	Sample_11.txt	WTEE	WT	EE		73200245	91.41
13	Sample_13.txt	WTEE	WT	EE		91991889	91.67
16	Sample_16.txt	WTEE	WT	EE		72164581	91.41
17	Sample_17.txt	WTEE	WT	EE		74592139	91.44
21	Sample_21.txt	WTEE	WT	EE		57175431	91.22
Average (excluding samples failing QC):						6.21098e+07	91.8286
SEM:						2.45107e+06	0.313376
Excluded samples:
4	Sample_4.txt					40882750	76.04
6	Sample_6.txt					62177895	85.85
7	Sample_7.txt					60910203	76.85
